# Supplementary material
Source: PubMed Central journal article supplement (PMC4186248)
Supplement: NIHMS613406-supplement-01.pdf [file NIHMS613406-supplement-01.pdf]

Supplementary Figure 1 (related to Figure 1). Metabolic assessment of *PIXs* mice (A) Snout-anus length in 25-week-old male anaesthetized mice (male wt, n = 7; *PIXs*, n = 6; p < 0.05). (B) Food intake was measured in 8-week-old weight matched male wild-type (n = 14) and *PIXs* (n = 14) for a week and is expressed here as 24 hr food intake. (C) Rearing activity as measured by beam break counts. \*P < 0.05 compared with control. Error bars indicate SEM.

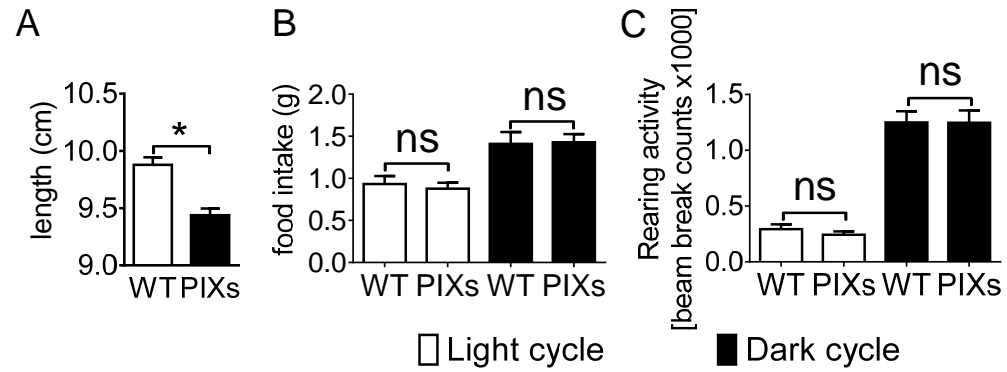

Supplemental Figure 1

Supplemental Figure 2 (related to Figure 6). Activation of ER stress blunts multiple signaling cascades activated by leptin. A. Slices were treated with saline (6h), tunicamycin (30 $\mu$ M; 2h or 6h), or dtt (1mM; 6h). Protein extracts were examined for expression of phospho-eif2 $\alpha$  and Bip, known targets of the UPR. B. Relative mRNA expression of *Bip* and *Chop* in organotypic slices following pretreatment with tm (30 $\mu$ M; 6h), or dtt (1mM; 6h). \*P < 0.05. Error bars indicate SEM.

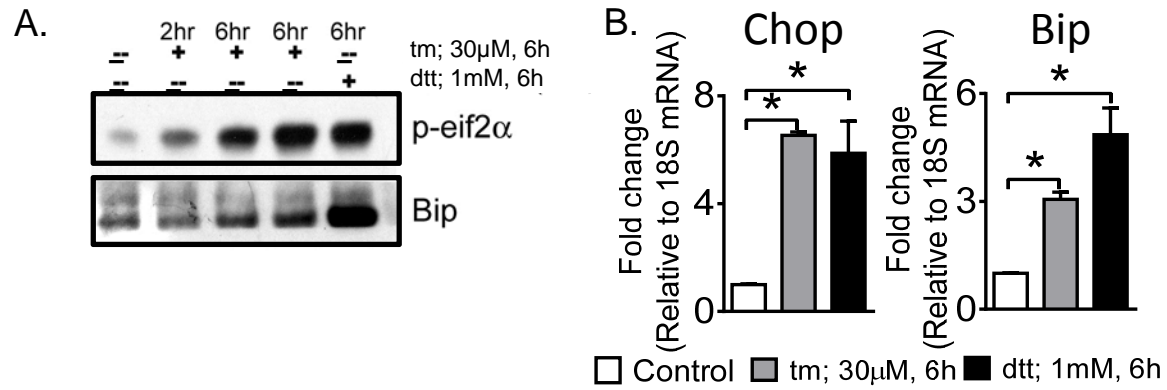

Supplemental Figure 2

Supplemental Figure 3 (related to Figure 7). ER stress blunts acute leptin and insulin signaling in *Pomc* neurons from organotypic hypothalamic slices. Whole-cell recordings were performed on organotypic hypothalamic slices containing *Pomc*-GFP neurons within the arcuate nucleus.

A. Histogram demonstrating the average cell size (as measured by whole cell capacitance) and whole cell input resistance between identified *Pomc* neurons from an organotypic and acute hypothalamic slice preparation. The resting membrane potential, whole-cell input resistance, and average cell size as measured by whole cell capacitance were not altered in *Pomc* neurons from organotypic slices as compared to *Pomc* neurons from an acute slice preparation. B. Plot demonstrates the resting membrane potential of *Pomc* neurons from organotypic and acute hypothalamic slices were similar. Moreover the leptin-induced activation of arcuate *Pomc* neurons was observed in the two preparations. Leptin (100nM) superfusion resulted in a similar depolarization of arcuate *Pomc* neurons from an acute hypothalamic slice preparation compared to the organotypic slice preparation. C. Plot shows that chemical activation of ER stress with tm (30 $\mu$ M, 6h) or tg (15 $\mu$ M, 6h) blunts the leptin induced depolarization of arcuate *Pomc* neurons. Pretreatment with tm (30 $\mu$ M, 6h;  $t_{(12)} = 7.799$ ) and tg (15 $\mu$ M, 6h;  $t_{(16)} = 9.305$ ) blunted the acute effects of leptin on arcuate *Pomc* neurons from organotypic hypothalamic slices. D. Histogram demonstrates (30 $\mu$ M, 6h) or tg (15 $\mu$ M, 6h) blunts the insulin-induced hyperpolarization of arcuate *Pomc* neurons. \*P < 0.05. Error bars indicate SEM. Insulin (50nM) superfusion resulted in a similar hyperpolarization of arcuate *Pomc* neurons from an acute hypothalamic slice preparation compared to the organotypic slice preparation. Pretreatment with tm (30 $\mu$ M, 6h;  $t_{(9)} = 5.474$ ) and tg (15 $\mu$ M, 6h;  $t_{(8)} = 5.043$ ) also prevented the insulin-induced hyperpolarization of arcuate *Pomc* neurons from organotypic hypothalamic slices.

?

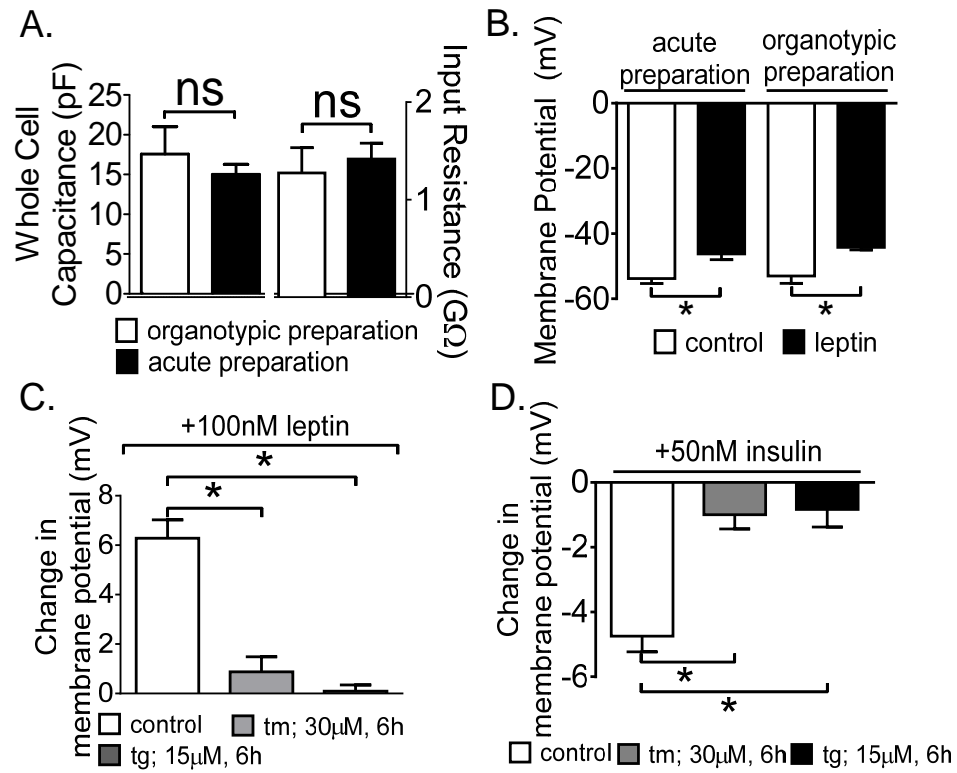

Supplemental Figure 3
